# Supplementary material
Source: PubMed Central journal article supplement (PMC1635445)

## SUPPLEMENTAL DATA

**Supplementary Table 1:** Primers used for Northern and Southern Probe generation.

|                                | Forward Primer (5'-3') | Reverse Primer (5'-3') |
|--------------------------------|------------------------|------------------------|
| <i>Sulf1</i> Northern probe    | ggatacctaattcaagctccc  | cacagctacactcctcagg    |
| <i>Sulf2</i> Northern probe    | catggtcacagccacgc      | agggtgcaggctggagg      |
| <i>Sulf1</i> 3' Southern probe | tctctcccaacaggctcag    | agcctgtacagctactagg    |
| <i>Sulf1</i> 5' Southern probe | gaaactttgagagctggtc    | gtgttctgcagcaacacg     |
| <i>Sulf2</i> 3' Southern probe | aaagtttaatgagaatagtagg | cagcatgtagttgatgctgg   |

**Supplementary Table 2:** PCR primer/probe sets used for real time PCR.

| Gene          | Forward primer (5'-3') | Reverse primer (5'-3') | Universal Probe number |
|---------------|------------------------|------------------------|------------------------|
| <i>L19</i>    | tcgttgccggaaaaacac     | ccgagcattggcagtacc     | 103                    |
| <i>EEF1G</i>  | ggcattatgcaccacaaca    | tcgcccactagaaaagttcg   | 66                     |
| <i>mSulf1</i> | aaagagtcaccttcaccctt   | tgaagtttgctatccacctct  | 66                     |
| <i>mSulf2</i> | cctcagtacagaccctacca   | cacgtgcagttggtaagga    | 47                     |

Supplementary Figure 1. Disaccharide compositional analysis of cell extract HS.

Disaccharides generated following digestion with heparinase I, II and III were fractionated by SAX-HPLC and identified by comparison with the elution positions of known standards. A; primary MEF cells, wild type (black bars), *mSulf1*<sup>-/-</sup> (white bars) and *mSulf2*<sup>-/-</sup> (check bars). B; Immortalised MEF lines, wild type (downwards diagonal bars) and *mSulf1*<sup>-/-</sup>/*2*<sup>-/-</sup> (upwards diagonal bars). Statistical analysis was performed using the two tailed T-test assuming equal variance: \*\* =  $p \leq 0.005$  and \* =  $p \leq 0.05$ .

# Supplementary Figure 1

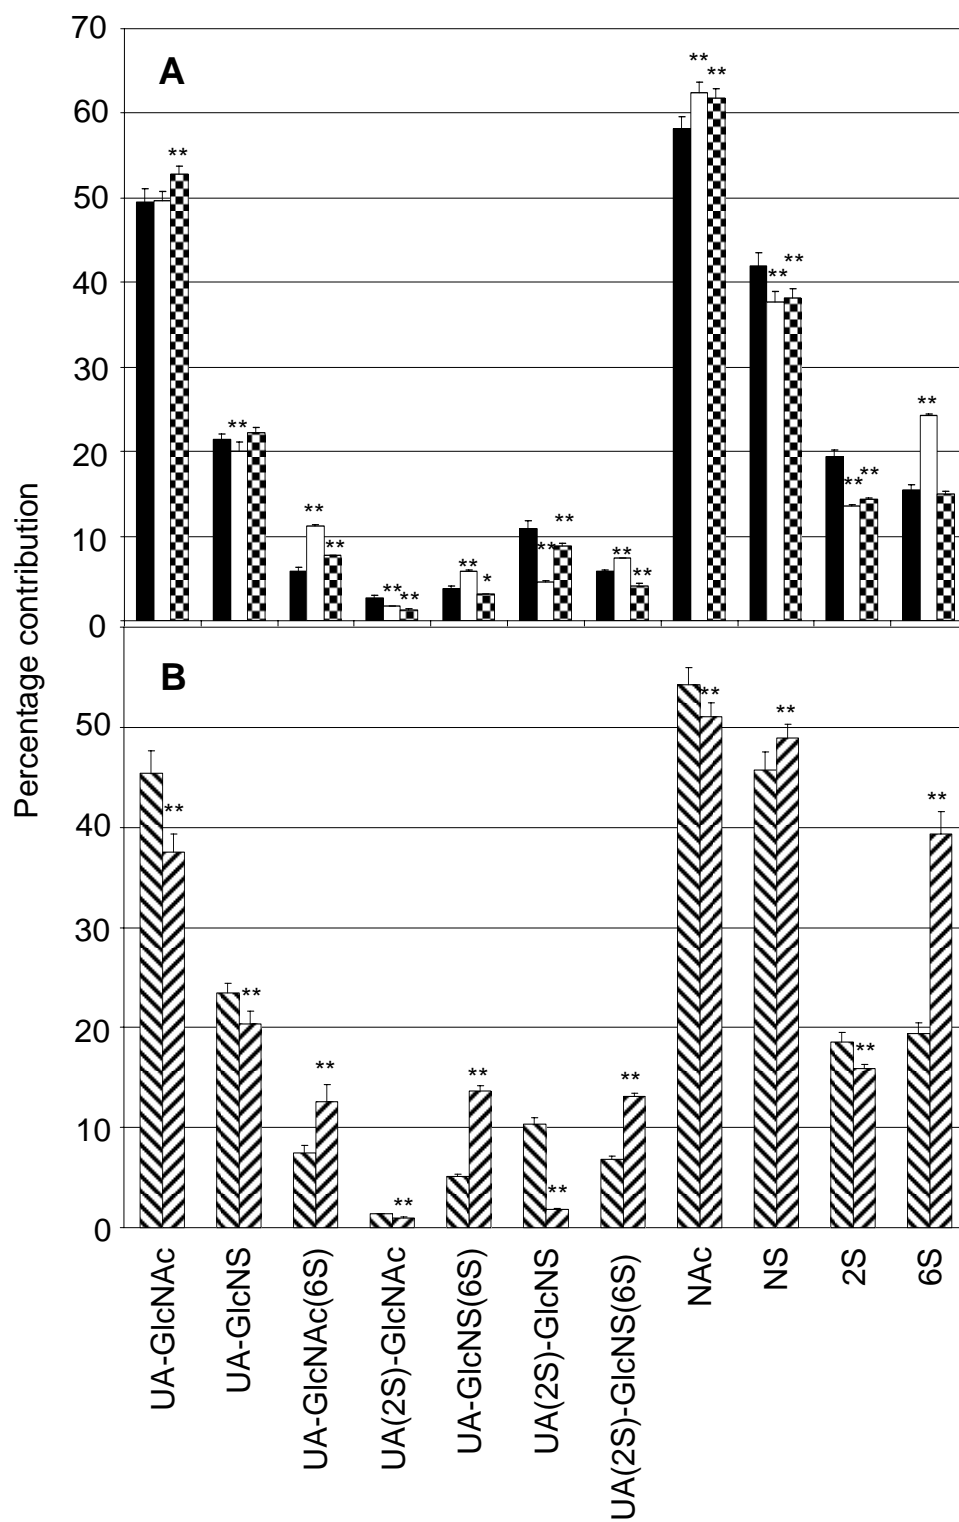

Supplement: bj4000063add.pdf [file bj4000063add.pdf]
